# Supplementary material for: Cost–utility analysis of germline BRCA1/2 testing in women with high-grade epithelial ovarian cancer in Spain
Source: Springer Nature journal article supplement (doi:10.1007/s12094-018-02026-2), 2019-01-08
Supplement: MOESM1 [file 16384996]

## **Online Resource**

**Article title:** Cost-utility analysis of germline BRCA1/2 testing in women with high-grade epithelial ovarian cancer in Spain.

**Journal name:** Clinical and Translational Oncology

### **Author names:**

- Carlota Moya-Alarcón
- Almudena Gonzalez-Dominguez
- Susana Simon
- Ines Perez-Roman
- Antonio Gonzalez-Martín
- Eloísa Bayo-Lozano
- Ana Beatriz Sánchez-Heras

### **Affiliation and e-mail address of the corresponding author:**

Almudena Gonzalez-Dominguez

Weber; 123, Las Norias Street; 28221 Majadahonda, Spain

[almudena.gonzalez@weber.org.es](mailto:almudena.gonzalez@weber.org.es)

**Caption of the Online Resource:** Estimating the relative efficiency a long term of the genetic test BRCA1/2 in germinal line in women with/without familiar antecedents of OC or BC in the Spanish Health System.

Table 1. Epithelial ovarian cancer and breast cancer risks, risk reduction after surgery and survival rates.

| 5-year risk of developing EOC among female gBRCA1/2m carriers |                        |                        |
|---------------------------------------------------------------|------------------------|------------------------|
| Age range (years)                                             | gBRCA1m                | gBRCA2m                |
| 30 - 39                                                       | 2%                     | 0%                     |
| 40 - 44                                                       | 3%                     | 0%                     |
| 45 - 49                                                       | 3%                     | 0%                     |
| 50 - 54                                                       | 6%                     | 3.5%                   |
| 55 - 59                                                       | 6%                     | 3.5%                   |
| 60 - 64                                                       | 10.5%                  | 4%                     |
| 65 - 69                                                       | 10.5%                  | 4%                     |
| 70 - 79                                                       | 3%                     | 2%                     |
| 5-year risk of developing BC among female gBRCA1/2m carriers  |                        |                        |
| Age range (years)                                             | gBRCA1m                | gBRCA2m                |
| 20 - 25                                                       | 2%                     | 2%                     |
| 26 - 30                                                       | 2%                     | 2%                     |
| 31 - 35                                                       | 10%                    | 4.5%                   |
| 36 - 40                                                       | 10%                    | 4.5%                   |
| 41 - 45                                                       | 9.5%                   | 11%                    |
| 46 - 50                                                       | 9.5%                   | 11%                    |
| 51 - 55                                                       | 6.5%                   | 9%                     |
| 56 - 60                                                       | 6.5%                   | 9%                     |
| 61 - 65                                                       | 5%                     | 4%                     |
| 66 - 70                                                       | 5%                     | 4%                     |
| EOC risk after uptake RRS among female gBRCA1/2m carriers     |                        |                        |
|                                                               | gBRCA1m<br>HR (95% CI) | gBRCA2m<br>HR (95% CI) |
| Bilateral mastectomy                                          | -                      | -                      |
| Bilateral salpingo-oophorectomy                               | 0.16 (0.09 – 0.26)     | 0.12 (0.06 – 0.23)     |
| Bilateral mastectomy and bilateral salpingo-oophorectomy      | -                      | -                      |
| BC risk after uptake RRS among female gBRCA1/2m carriers      |                        |                        |

|                                                          | gBRCA1m<br>HR (95% CI) | gBRCA2m<br>HR (95% CI) |
|----------------------------------------------------------|------------------------|------------------------|
| Bilateral mastectomy                                     | 0.10 (0.03 – 0.31)     | 0.09 (0.03 – 0.31)     |
| Bilateral salpingo-oophorectomy                          | 0.51 (0.39 – 0.66)     | 0.39 (0.29 – 0.54)     |
| Bilateral mastectomy and bilateral salpingo-oophorectomy | 0.05 (0.01 – 0.22)     | 0.05 (0.01 – 0.22)     |
| 5-year survival rate                                     |                        |                        |
| Age range (years)                                        | OC                     | BC                     |
| 15-44                                                    | 69.9%                  | 81.0%                  |
| 45-54                                                    | 52.3%                  | 86.7%                  |
| 55-64                                                    | 43.6%                  | 85.2%                  |
| 65-74                                                    | 29.0%                  | 78.7%                  |
| 75-84                                                    | 18.8%                  | 73.6%                  |
| 85-99                                                    | 18.8%                  | 73.6%                  |

Abbreviations: BC: breast cancer; CI: confidence interval; gBRCA1/2m: germline mutation in *BRCA1* or *BRCA2* genes; HR: hazard ratio; EOC: Epithelial Ovarian Cancer; RRS: risk-reducing surgery.

References: Kuchenbaecker et al., 2017 [1]; Eccleston et al., 2017 [2]; Chirlaque et al., 2010 [3].

Table 2 Unit costs (€ 2017)

|                                                     | Unit costs |
|-----------------------------------------------------|------------|
| Testing                                             |            |
| BRCA point mutation test (Initial population).      | €469.50    |
| BRCA large rearrangement test (Initial population). | €100.47    |
| BRCA exon sequence analysis (Relatives).            | €55.15     |
| BRCA large rearrangement test (Relatives).          | €76.47     |
| Genetic counselling visit                           | €156.06    |
| CA125 test                                          | €1.85      |
| Risk-reduction surgery                              |            |
| Bilateral salpingo-oophorectomy                     | €4,053.9   |
| Bilateral mastectomy*                               | €4,726.7   |
| Surveillance                                        |            |
| Magnetic resonance imaging                          | €12        |
| Mammography                                         | €9.45      |
| Transvaginal ultrasound                             | €7.41      |
| Palliative care                                     |            |
| Home visit (primary care physician)                 | €5.76      |
| Nursing (domiciliary)                               | €4.00      |
| Hospitalization (EOC patients)*                     | €5,610.51  |
| Hospitalization (BC patients)*                      | €5,581.46  |
| Home services                                       | €1,700.00  |

References: Official Bulletins of Autonomous Communities [4], \*Ministry of Health, Social Services and Equality [5].

Table 3. Cost of cancer management (€ 2017).

|                           |                       |          |           |           |            |           |           |
|---------------------------|-----------------------|----------|-----------|-----------|------------|-----------|-----------|
| Epithelial ovarian cancer | Stage                 | I        |           | II        | III        | IV        | Total     |
|                           | Incident patients     | 37.00%   |           | 6.00%     | 35.00%     | 22.00%    | 100%      |
|                           | HDC Without surgery*  | €4,652.4 |           | €7,553.8  | €20,423.5  | €37,936.9 | €17,067   |
|                           | HDC With surgery*     | €5,446.7 |           | €9,104.2  | 23.303,2 € | €41,147.6 | €19,091.6 |
| Breast cancer             | Stage                 | 0        | I         | II        | III        | IV        | Total     |
|                           | Incident patients     | 9.34%    | 47.40%    | 31.37%    | 9.55%      | 2.01%     | 100%      |
|                           | CT Without surgery    | €6,843.5 | €13,266   | €18,161.9 | €24,825.6  | €14,959.3 | €15,355.7 |
|                           | CT With surgery       | €9,886.4 | €17,358.0 | €22,254.0 | €28,917.7  | €14,959.3 | €19,267.6 |
|                           | Hormone therapy       | -        |           |           |            |           | 704,45€   |
|                           | Other healthcare cost | -        |           |           |            |           | €8,057.1  |
|                           | HDC Without surgery   | -        |           |           |            |           | €23,412.8 |
|                           | HDC With surgery      | -        |           |           |            |           | €27,324.7 |

Abbreviations: CT: cost of treatment; HDC: healthcare direct costs.

Notes: \*Do not include the cost of the hormone therapy (anastrozol).

References: Arrospe et al., 2015 [6]; García-Gutiérrez et al., 2018 [7], Luengo et al., 2013 [8], and OvarCost study [9].

Table 4. Utility values.

| Health states                                                          | Utilities                       |                  |             |             | Duration of the effect (years) <sup>§</sup> |
|------------------------------------------------------------------------|---------------------------------|------------------|-------------|-------------|---------------------------------------------|
|                                                                        | General population <sup>‡</sup> | BRCA1/2 carriers | OC patients | BC patients |                                             |
| General population: Perfect health                                     | 1.00                            | 1.00             | -           | -           | -                                           |
| 1 – 24 years                                                           | 0.94                            | -                | -           | -           | -                                           |
| 25 - 34 years                                                          | 0.93                            | -                | -           | -           | -                                           |
| 35 - 44 years                                                          | 0.91                            | -                | -           | -           | -                                           |
| 45 - 54 years                                                          | 0.85                            | -                | -           | -           | -                                           |
| 55 - 64 years                                                          | 0.81                            | -                | -           | -           | -                                           |
| 65 – 74 years                                                          | 0.78                            | -                | -           | -           | -                                           |
| 75 - 101 years                                                         | 0.71                            | -                | -           | -           | -                                           |
| Risk-reducing surgery                                                  |                                 |                  |             |             |                                             |
| Bilateral salpingo-oophorectomy ( $\pm$ SD)                            | 0.90 $\pm$ 0.14                 | 0.95 $\pm$ 0.10  | -           | -           | 1.00                                        |
| Bilateral mastectomy ( $\pm$ SD)                                       | 0.88 $\pm$ 0.17                 | 0.88 $\pm$ 0.22  | -           | -           | 1.00                                        |
| Bilateral mastectomy and bilateral salpingo-oophorectomy ( $\pm$ SD)   | 0.79 $\pm$ 0.21                 | 0.84 $\pm$ 0.23  | -           | -           | 1.00                                        |
| Psychological impact of a positive result in germline BRCA1/2 testing* | 1.00                            | 1.00             | -           | -           | -                                           |
| After diagnosis of cancer                                              |                                 |                  |             |             |                                             |
| Year 1                                                                 | -                               | -                | 0.50        | 0.71        | -                                           |
| Year 2                                                                 | -                               | -                | 0.65        | 0.72        | -                                           |
| Year 3                                                                 | -                               | -                | 0.67        | 0.73        | -                                           |
| Year 4                                                                 | -                               | -                | 0.69        | 0.74        | -                                           |
| Year 5                                                                 | -                               | -                | 0.70        | 0.76        | -                                           |
| Year 6 and following years                                             | -                               | -                | 0.72        | 0.77        | -                                           |
| Death                                                                  | 0.00                            | 0.00             | -           | -           | -                                           |

Notes: \*Assumption based on Halbert *et al.*, 2011 [10] and Sie *et al.*, 2015 [11]; §Assumption from the Institute of cancer research; ‡ Population with an unknown BRCA1/2 status.

References: Grann *et al.*, 2011 [12], Havrilesky *et al.*, 2009 [13], Kind *et al.*, 1999 [14], NICE, 2013 [15] and Peasgood *et al.*, 2010 [16]. Abbreviations: SD: standard deviation.

Table 5. Sensitivity analysis parameters.

| Parameter                 | Base case | Standard error | Distribution |
|---------------------------|-----------|----------------|--------------|
| Base case                 |           |                |              |
| Discount rate (cost)      | 3%        | 0.004          | Beta         |
| Discount rate (utility)   | 3%        | 0.004          | Beta         |
| Time horizon (years)      | 50        | –              | None         |
| EOC risk in 5 years       |           |                |              |
| BRCA1 patients: age 30–39 | 2.0%      | 0.003          | Beta         |
| BRCA1 patients: age 40–44 | 3.0%      | 0.004          | Beta         |
| BRCA1 patients: age 45–49 | 3.0%      | 0.004          | Beta         |
| BRCA1 patients: age 50–54 | 6.0%      | 0.008          | Beta         |
| BRCA1 patients: age 55–59 | 6.0%      | 0.008          | Beta         |
| BRCA1 patients: age 60–64 | 10.5%     | 0.013          | Beta         |
| BRCA1 patients: age 65–69 | 10.5%     | 0.013          | Beta         |
| BRCA1 patients: age 70–79 | 3.0%      | 0.004          | Beta         |
| BRCA2 patients: age 30–39 | 0.0%      | 0.000          | Beta         |
| BRCA2 patients: age 40–44 | 0.0%      | 0.000          | Beta         |
| BRCA2 patients: age 45–49 | 0.0%      | 0.000          | Beta         |
| BRCA2 patients: age 50–54 | 3.5%      | 0.004          | Beta         |
| BRCA2 patients: age 55–59 | 3.5%      | 0.004          | Beta         |
| BRCA2 patients: age 60–64 | 4.0%      | 0.005          | Beta         |
| BRCA2 patients: age 65–69 | 4.0%      | 0.005          | Beta         |
| BRCA2 patients: age 70–79 | 2.0%      | 0.003          | Beta         |
| BC risk in 5 years        |           |                |              |
| BRCA1 patients: age 20–25 | 2.0%      | 0.003          | Beta         |
| BRCA1 patients: age 26–30 | 2.0%      | 0.003          | Beta         |
| BRCA1 patients: age 31–35 | 10.0%     | 0.013          | Beta         |
| BRCA1 patients: age 36–40 | 10.0%     | 0.013          | Beta         |
| BRCA1 patients: age 41–45 | 9.5%      | 0.012          | Beta         |
| BRCA1 patients: age 46–50 | 9.5%      | 0.012          | Beta         |
| BRCA1 patients: age 51–55 | 6.5%      | 0.008          | Beta         |
| BRCA1 patients: age 56–60 | 6.5%      | 0.008          | Beta         |
| BRCA1 patients: age 61–65 | 5.0%      | 0.006          | Beta         |
| BRCA1 patients: age 66–70 | 5.0%      | 0.006          | Beta         |
| BRCA2 patients: age 20–25 | 2.0%      | 0.003          | Beta         |
| BRCA2 patients: age 26–30 | 2.0%      | 0.003          | Beta         |
| BRCA2 patients: age 31–35 | 4.5%      | 0.006          | Beta         |

|                                                          |       |       |            |
|----------------------------------------------------------|-------|-------|------------|
| BRCA2 patients: age 36–40                                | 4.5%  | 0.006 | Beta       |
| BRCA2 patients: age 41–45                                | 11.0% | 0.014 | Beta       |
| BRCA2 patients: age 46–50                                | 11.0% | 0.014 | Beta       |
| BRCA2 patients: age 51–55                                | 9.0%  | 0.011 | Beta       |
| BRCA2 patients: age 56–60                                | 9.0%  | 0.011 | Beta       |
| BRCA2 patients: age 61–65                                | 4.0%  | 0.005 | Beta       |
| BRCA2 patients: age 66–70                                | 4.0%  | 0.005 | Beta       |
| Bilateral salpingo-oophorectomy                          |       |       |            |
| BRCA1: Estimated age of surgery                          | 35    | 4.46  | Normal     |
| BRCA1: Uptake rate                                       | 65%   | 0.08  | Beta       |
| BRCA2: Estimated age of surgery                          | 35    | 4.46  | Normal     |
| BRCA2: Uptake rate                                       | 65%   | 0.08  | Beta       |
| BRCA1: EOC risk (HR)                                     | 0.16  | 0.27  | Log-normal |
| BRCA1: BC risk (HR)                                      | 0.51  | 0.13  | Log-normal |
| BRCA2: EOC risk (HR)                                     | 0.12  | 0.34  | Log-normal |
| BRCA2: BC risk (HR)                                      | 0.39  | 0.16  | Log-normal |
| Bilateral mastectomy                                     |       |       |            |
| BRCA1: Estimated age of surgery                          | 40    | 5.10  | Normal     |
| BRCA1: Uptake rate                                       | 20%   | 0.03  | Beta       |
| BRCA2: Estimated age of surgery                          | 40    | 5.10  | Normal     |
| BRCA2: Uptake rate                                       | 20%   | 0.03  | Beta       |
| BRCA1: BC risk (HR)                                      | 0.10  | 0.60  | Log-normal |
| BRCA2: BC risk (HR)                                      | 0.09  | 0.60  | Log-normal |
| Bilateral mastectomy and bilateral salpingo-oophorectomy |       |       |            |
| BRCA1: Riesgo de sufrir COE (HR)                         | 0.16  | 0.27  | Log-normal |
| BRCA1: Riesgo de sufrir CM (HR)                          | 0.05  | 0.79  | Log-normal |
| BRCA2: Riesgo de sufrir COE (HR)                         | 0.12  | 0.34  | Log-normal |
| BRCA2: Riesgo de sufrir CM (HR)                          | 0.05  | 0.79  | Log-normal |
| Accumulated survival rate                                |       |       |            |
| Male: age 0–101                                          | –     | –     | Beta       |
| Female: age 0–101                                        | –     | –     | Beta       |
| EOC survival rate in 5 years                             |       |       |            |
| Age: 15–39                                               | 69.9% | 0.09  | Beta       |
| Age: 40–49                                               | 52.3% | 0.07  | Beta       |
| Age: 50–59                                               | 43.6% | 0.06  | Beta       |
| Age: 60–69                                               | 29.0% | 0.04  | Beta       |
| Age: 70–79                                               | 18.8% | 0.02  | Beta       |



|                                                                                  |            |           |       |
|----------------------------------------------------------------------------------|------------|-----------|-------|
| Age: 80–99                                                                       | 18.8%      | 0.02      | Beta  |
| BC survival rate in 5 years                                                      |            |           |       |
| Age: 15–39                                                                       | 81.0%      | 0.10      | Beta  |
| Age: 40–49                                                                       | 86.7%      | 0.09      | Beta  |
| Age: 50–59                                                                       | 85.2%      | 0.09      | Beta  |
| Age: 60–69                                                                       | 78.7%      | 0.10      | Beta  |
| Age: 70–79                                                                       | 73.6%      | 0.09      | Beta  |
| Age: 80–99                                                                       | 73.6%      | 0.09      | Beta  |
| Unit costs                                                                       |            |           |       |
| BRCA test (Initial population)                                                   | €479.55    | €1.17     | Gamma |
| Genetic counselling visit (Initial population)                                   | €156.06    | €19.91    | Gamma |
| BRCA test (Relatives)                                                            | €2.80      | €8.01     | Gamma |
| Genetic counselling visit (Relatives)                                            | €156.06    | €19.91    | Gamma |
| Bilateral salpingo-oophorectomy                                                  | €4,053.93  | €17.09    | Gamma |
| Bilateral mastectomy                                                             | €4,726.72  | €602.91   | Gamma |
| EOC (with surgery)                                                               | €17,067.00 | €2,176.95 | Gamma |
| BC (with surgery)                                                                | €7,249.51  | €3,475.77 | Gamma |
| EOC (without surgery)                                                            | €15,042.44 | €1,918.71 | Gamma |
| BC (without surgery)                                                             | €23,337.60 | €2,976.79 | Gamma |
| Palliative care (EOC)                                                            | €3,648     | €465.36   | Gamma |
| Palliative care (BC)                                                             | €3,522     | €449.26   | Gamma |
| Palliative care (all-cause mortality)                                            | €74        | €35.00    | Gamma |
| Hormone therapy (per day)                                                        | €1.9       | €0.25     | Gamma |
| Magnetic resonance imaging                                                       | €12.0      | €39.80    | Gamma |
| Mammography, transvaginal ultrasound and CA125 test (annual screening)           | €208.0     | €26.53    | Gamma |
| Utilities                                                                        |            |           |       |
| Perfect health (controls)                                                        | 1.00       | –         | None  |
| Bilateral salpingo-oophorectomy (controls)                                       | 0.90       | 0.08      | Beta  |
| Bilateral mastectomy (controls)                                                  | 0.88       | 0.09      | Beta  |
| Bilateral mastectomy and bilateral salpingo-oophorectomy (controls)              | 0.79       | 0.10      | Beta  |
| Psychological impact of a positive result in germline BRCA1/2 testing (controls) | 1.00       | 0.06      | Beta  |
| Death (controls)                                                                 | 0.00       | –         | None  |
| Perfect health (patients)                                                        | 1.00       | –         | None  |
| Bilateral salpingo-oophorectomy (patients)                                       | 0.95       | 0.07      | Beta  |
| Bilateral mastectomy (patients)                                                  | 0.88       | 0.09      | Beta  |
| Bilateral mastectomy and bilateral salpingo-oophorectomy (patients)              | 0.84       | 0.09      | Beta  |

|                                                                                  |        |      |            |
|----------------------------------------------------------------------------------|--------|------|------------|
| Psychological impact of a positive result in germline BRCA1/2 testing (patients) | 1.00   | 0.06 | Beta       |
| Death (patients)                                                                 | 0.00   | –    | None       |
| Utilities related to age 1–101 (males)                                           | –      | –    | Beta       |
| Utilities related to age 1–101 (females)                                         | –      | –    | Beta       |
| Year 1 (OC)                                                                      | 0.50   | 0.06 | Beta       |
| Year 2 (OC)                                                                      | 0.65   | 0.08 | Beta       |
| Year 3 (OC)                                                                      | 0.67   | 0.09 | Beta       |
| Year 4 (OC)                                                                      | 0.69   | 0.09 | Beta       |
| Year 5 (OC)                                                                      | 0.70   | 0.09 | Beta       |
| Year 6 and following years (OC)                                                  | 0.72   | 0.09 | Beta       |
| Year 1 (BC)                                                                      | 0.71   | 0.09 | Beta       |
| Year 2 (BC)                                                                      | 0.72   | 0.09 | Beta       |
| Year 3 (BC)                                                                      | 0.73   | 0.09 | Beta       |
| Year 4 (BC)                                                                      | 0.74   | 0.09 | Beta       |
| Year 5 (BC)                                                                      | 0.76   | 0.10 | Beta       |
| Year 6 and following years (BC)                                                  | 0.77   | 0.10 | Beta       |
| Duration of the effect (years)                                                   |        |      |            |
| Perfect health                                                                   | –      | –    | None       |
| Bilateral salpingo-oophorectomy                                                  | 1.00   | 0.06 | Log-normal |
| Bilateral mastectomy                                                             | 1.00   | 0.06 | Log-normal |
| Bilateral mastectomy and bilateral salpingo-oophorectomy                         | 1.00   | 0.06 | Log-normal |
| Psychological impact of a positive result in germline BRCA1/2 testing            | 1.00   | 0.06 | Log-normal |
| Death                                                                            | –      | –    | None       |
| Population                                                                       |        |      |            |
| Initial population                                                               | 1,588  | –    | None       |
| Age of the initial population (years), average                                   | 51     | 6.51 | Normal     |
| Age of the initial population (years), SD                                        | 5      | –    | None       |
| Probability of gBRCA1/2m (initial population)                                    | 7.3%   | 0.01 | Beta       |
| Probability of mutation in <i>BRCA1</i> gene (initial population)                | 66.83% | 0.09 | Beta       |
| Probability of gBRCA1/2m (first-degree relatives)                                | 50%    | 0.06 | Beta       |
| Age of the mother (years), average                                               | 28     | 3.57 | Normal     |
| Age of the mother (years), SD                                                    | 2      | –    | None       |
| Age of the father (years), average                                               | 30     | 3.83 | Normal     |
| Age of the father (years), SD                                                    | 2      | –    | None       |
| Number of siblings, average                                                      | 0.69   | 0.13 | Log-normal |
| Number of siblings, SD                                                           | 0.26   | –    | None       |

|                                                                                              |        |      |        |
|----------------------------------------------------------------------------------------------|--------|------|--------|
| Age of siblings (relative to index population), average                                      | 2      | –    | None   |
| Age of siblings (relative to index population), SD                                           | 0      | –    | None   |
| Gender, probability female (among siblings)                                                  | 48.34% | 0.06 | Beta   |
| Number of children, average                                                                  | 1.55   | –    | None   |
| Number of children, SD                                                                       | 0      | -    | None   |
| Age of the siblings, average                                                                 | -28    | 3.57 | Normal |
| Age of the siblings, SD                                                                      | 2      | –    | None   |
| Gender, probability female (among children)                                                  | 48.34% | 0.06 | Beta   |
| Probability of gBRCA1/2m (second-degree relatives)                                           | 25%    | 0.03 | Beta   |
| Surveillance                                                                                 |        |      |        |
| Magnetic resonance imaging (years), minimum age                                              | 25     | 3.19 | Normal |
| Magnetic resonance imaging (years), maximum age                                              | 70     | 8.93 | Normal |
| Mammography, transvaginal ultrasound and CA125 tests [annual screening] (years), minimum age | 30     | –    | –      |
| Mammography, transvaginal ultrasound and CA125 tests [annual screening] (years), maximum age | 75     | 9.57 | Normal |

Abbreviations: HR: hazard ratio; SD: standard deviation; gBRCA1/2m: germline mutations in *BRCA1* and *BRCA2* genes.

1. Kuchenbaecker KB, Hopper JL, Barnes DR, Phillips KA, Mooij TM, Roos-Blom MJ, et al. Risks of Breast, Ovarian, and Contralateral Breast Cancer for BRCA1 and BRCA2 Mutation Carriers. *JAMA*. 2017;317:2402.
2. Eccleston A, Bentley A, Dyer M, Strydom A, Vereecken W, George A, et al. A Cost-Effectiveness Evaluation of Germline BRCA1 and BRCA2 Testing in UK Women with Ovarian Cancer. *Value Health*. 2017;20:567–76.
3. Chirlaque MD, Salmerón D, Ardanaz E, Galceran J, Martínez R, Marcos-Gragera R, et al. Cancer survival in Spain: estimate for nine major cancers. *Ann Oncol*. 2010;21:iii21–9.
4. Mediana de los costes de los Boletines Oficiales de las Comunidades Autónomas. 2017.
5. Ministerio de Sanidad, Servicios Sociales e Igualdad. Instituto de Información Sanitaria. Registro de altas. 2015.
6. Arrospide A, Soto-Gordoa M, Acaiturri T, López-Vivanco G, Abecia LC, Mar J. Cost of Breast Cancer Treatment by Clinical Stage in the Basque Country, Spain. *Rev Esp Salud Pública*. 2015;89:93–97.
7. García-Gutierrez S, Sarasqueta C, Legarreta MJ, Gonzalez N, Redondo M, Rivero A, et al. Health services research in patients with breast cancer (CAMISS-prospective): study protocol for an observational prospective study. *BMC Cancer*. 2018;18.
8. Luengo-Fernandez R, Leal J, Gray A, Sullivan R. Economic burden of cancer across the European Union: a population-based cost analysis. *Lancet Oncol*. 2013;14:1165–1174.
9. Delgado-Ortega L, González-Domínguez A, Borrás J, Oliva J, González-Haba E, Menjón S, et al. The Economic Burden of Disease of Epithelial Ovarian Cancer in Spain. The Ovarcost Study. *Eur J Health Econ*. 2018;
10. Halbert CH, Stopfer JE, McDonald J, Weathers B, Collier A, Troxel AB, et al. Long-Term Reactions to Genetic Testing for BRCA1 and BRCA2 Mutations: Does Time Heal Women’s Concerns? *J Clin Oncol*. 2011;29:4302–6.

11. Sie AS, Spruijt L, van Zelst-Stams WAG, Mensenkamp AR, Ligtenberg MJL, Brunner HG, et al. High Satisfaction and Low Distress in Breast Cancer Patients One Year after BRCA-Mutation Testing without Prior Face-to-Face Genetic Counseling. *J Genet Couns.* 2016;25:504–14.
12. Grann VR, Patel PR, Jacobson JS, Warner E, Heitjan DF, Ashby-Thompson M, et al. Comparative effectiveness of screening and prevention strategies among BRCA1/2-affected mutation carriers. *Breast Cancer Res Treat.* 2011;125:837–47.
13. Havrilesky LJ, Broadwater G, Davis DM, Nolte KC, Barnett JC, Myers ER, et al. Determination of quality of life-related utilities for health states relevant to ovarian cancer diagnosis and treatment. *Gynecol Oncol.* 2009;113:216–20.
14. Kind P, Hardman G, Macran S. UK population norms for EQ-5D. In: Centre for Health Economics, University of York. 1999. Available from: <https://econpapers.repec.org/paper/chyrespap/172chedp.htm>. Accessed 29 Aug 2018.
15. National Institute for Clinical Excellence (NICE). Cost-effectiveness evidence review. Familial breast cancer: classification and care of women at risk of familial breast cancer and management of breast cancer and related risk in people with a family history of breast cancer. 2013.
16. Peasgood T, Ward SE, Brazier J. Health-state utility values in breast cancer. *Expert Rev Pharmacoecon Outcomes Res.* 2010;10:553–66.
